# Supplementary material for: Bowl-like sulfur particles wrapped by graphene oxide as cathode material of lithium–sulfur batteries
Source: Royal Society of Chemistry journal article supplement (doi:10.1039/c5ra00744e), 2015-01-01
Supplement: c5ra00744e1.pdf [file c5ra00744e1.pdf]

Electronic Supplementary Information

# **Bowl-like Sulfur Particles Wrapped by Graphene Oxide as Cathode Material of Lithium-Sulfur Batteries**

Chunxiao Sun, Lin Shi, Chenyao Fan, Xinxin Fu, Zhimin Ren, Guodong Qian and Zhiyu Wang<sup>\*a</sup>

<sup>a</sup> State Key Laboratory of Silicon Materials, School of Materials Science and Engineering, Zhejiang University, Hangzhou 310027, China. E-mail: [wangzhiyu@zju.edu.cn](mailto:wangzhiyu@zju.edu.cn). Tel: +86-571-87952539

## **1. Experimental section**

### **1.1 Sulfur particles preparation**

Sodium thiosulfate (0.004 mol) and a certain amount of PVP were dissolved in deionized water to form a 100 ml aqueous solution at room temperature. Then, 0.67 mL concentrated hydrochloric acid was added into the solution under magnetic stirring. After reacting for 2 hours, the precipitate was collected by suction filtration and washed with deionized water.

### **1.2 GO-wrapped bowl-like Sulfur composite synthesis**

To prepare GO-BS composite, GO solution and as-prepared sulfur particles were mixed together in 1 M HCl (or NaCl) aqueous solution, and sonicated for 10 minutes. Then the suspensions were stirred for 1 hour. The products were collected, and washed with deionized water using centrifuge and suction filtration.

### **1.3 Characterization**

The morphology and microstructure of obtained products were investigated by field emission scanning electron microscopy (FESEM, Hitachi S4800) operating at 80 KV and transmission electron microscopy (TEM, JEM-1230). The samples were prepared by dropping the products suspension on carbon-coated copper grid (TEM) or silicon wafer (SEM) and drying in air. Thermogravimetric analysis (TGA) was recorded using a CHNS/O analyzer (PE 2400II, PerkinElmer, America) in the range of 35-400 °C at a heating rate of 5 °C/min.

To prepare the working electrodes, GO-S particles were mixed with polyvinylidene fluoride (PVDF) binder and carbon black (8:1:1 by weight) in N-methyl-2-pyrrolidinone (NMP) to form a slurry. The slurry was coated onto aluminum foil using a glass rod and then dried at 60 °C for 12 hours to form the working electrodes. 2032-type coin cells were assembled in an argon-filled glovebox using lithium metal as counter electrode. Lithium bis(trifluoromethanesulfonyl)imide (1 M) in 1:1 v/v 1,2-dimethoxyethane (DME) and 1,3-dioxolane (DOL) containing 1 wt% LiNO<sub>3</sub> was used as the electrolyte. Galvanostatic cycling were carried out using a LAND Cell tester (Wuhan

Land Electronic Co., China) from 1.5 V- 3.0 V versus  $\text{Li}^+/\text{Li}^0$ .

## 2. Additional images

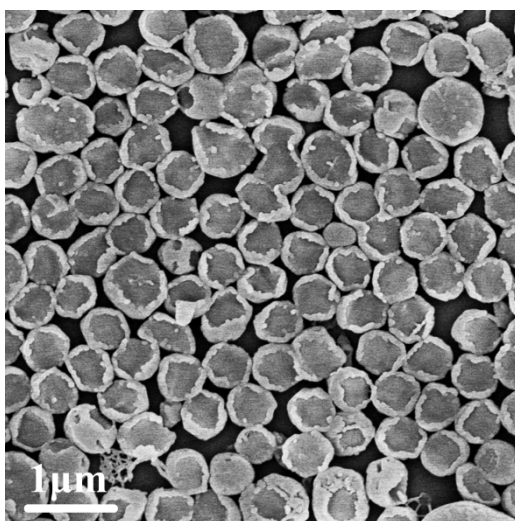

**Fig. S1** Additional SEM image of prepared bowl-like sulfur particles.

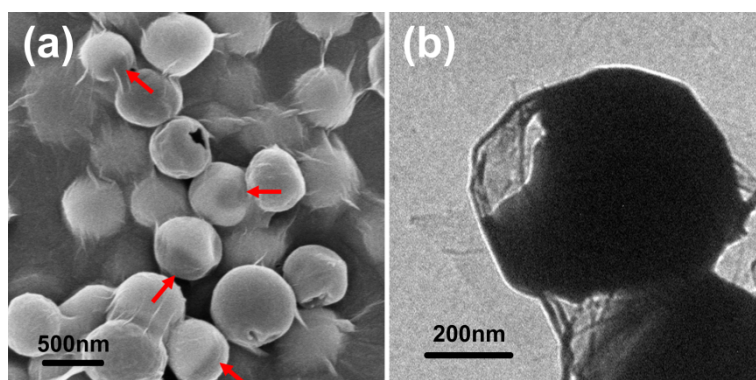

**Fig. S2** Additional (a) SEM image and (b) TEM image of prepared GO-BS composite. Red arrows in the SEM image pointed out the visible void space inside the shell.

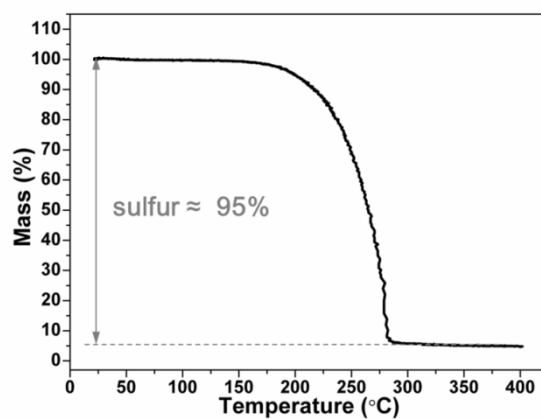

**Fig. S3** Thermal gravimetric analysis (TGA) analysis curve of GO-wrapped sulfur composite recorded in the range of 35-400 °C at a heating rate of 5 °C/min.

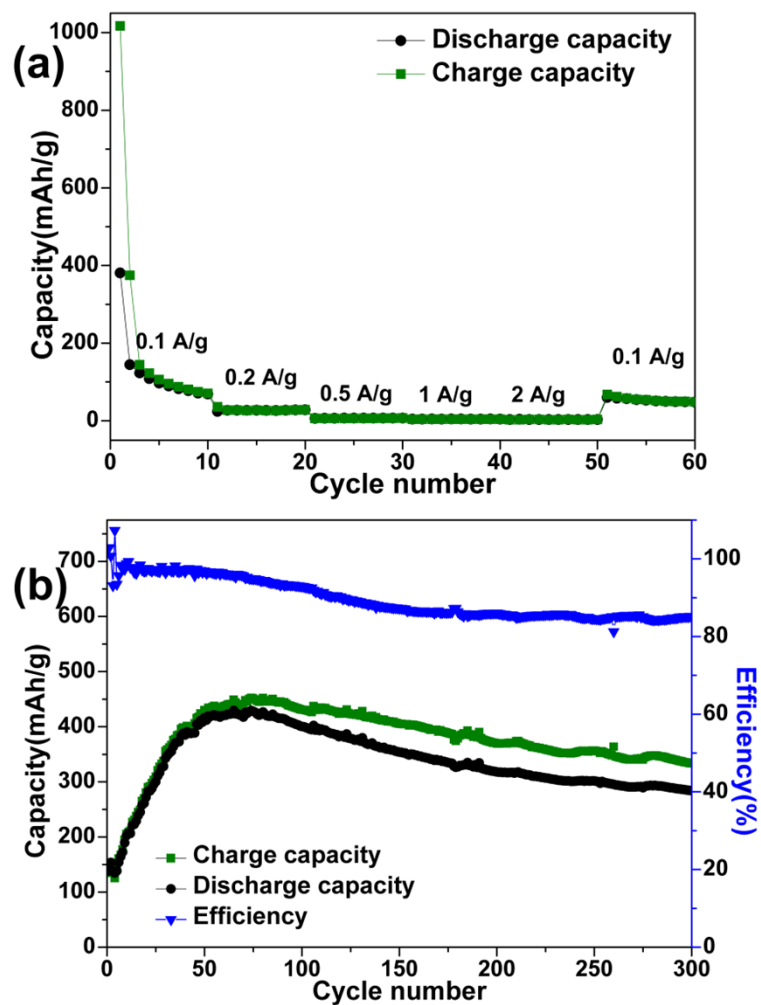

**Fig. S4** (a) Rate properties of pure sulfur particles at different current rates. (b) Cycling performance of GO-wrapped solid sulfur (whose morphology was shown in fig. 1(a)) composite at 1 A/g. The initial discharge capacity was less than 200 mAh/g. After 300 cycles, the discharge capacity decayed faster and the efficiency was much lower than that of GO-BS cathode under exactly the same situation (Fig. 3(d)).
